# Supplementary material
Source: publisher figshare collection journal article supplement (https://sage.figshare.com/ndownloader/files/17636522)
Supplement: Supplementary file 1 [file 17636522]

## **Supplementary Data 2 Thematic Analysis Categories and Codes**

### **Perceptions of the healthcare system and healthcare providers in England versus their country of origin**

- Registration with the GP
  - Information provided at the time of registration with GP
- Access to health care in England
- Trust in the English healthcare system
- Attitudes towards the differences in two healthcare systems
- Access to healthcare in their country of birth
- General health behaviour's prior to migration
- Doctor-patient relationship

### **The social interactions of the migrant Eastern European population**

- Access to the migrant population
- Integration of the migrant group with society, barriers and facilitators
  - Lifestyle
  - Isolation
  - Social interaction
  - Stigma felt as a migrant
- Employment

### **Knowledge, awareness and understanding of cervical cancer and the cervical screening programme.**

- Cervical cancer
  - Awareness/Knowledge
    - Breast Cancer
- Cervical cancer screening
  - Awareness of cervical cancer screening
  - Knowledge of the programme
  - Knowledge of the test
- Information provided at the time of the smear test

### **Access to information about cervical cancer and screening and the adequacy of currently available knowledge.**

- Sources of information about cervical cancer and screening
- Need for more information

### **Knowledge, awareness and understanding of cervical cancer and the cervical screening programme in their country of birth prior to migration.**

- Cervical cancer
- Cervical cancer screening
- Information provided

### **Cervical screening; from the invitation to the smear test.**

- The smear invitation letter
  - The reminder letter
  - The information leaflet
- Access to cervical screening services

- Cervical screening behaviours
  - Age of first smear test
  - Views on starting age of smear test
  - Influences
  - Barriers
  - Motivation
  - Priority
  - Screening frequency
  - Attitudes towards screening frequency
- The smear experience
  - Quality
  - Emotions
  - The person performing the smear test
    - Role
    - Gender

### **An “Abnormal Result” Receiving an abnormal smear result**

- Abnormal results
- Colposcopy

### **Human Papillomavirus- Awareness and attitudes towards HPV**

- Awareness and knowledge of HPV
- Sources of HPV related information
- Attitudes and emotions
- Sexually transmitted disease

### **Human Papillomavirus Vaccine**

- Awareness and knowledge of the HPV vaccine
- Vaccination status
- Attitudes towards HPV vaccination

### **Human Papillomavirus Testing**

- Awareness and attitudes towards current HPV testing
- Views, attitudes and perceptions about primary HPV testing

### **Cervical cancer prevention in their country of birth for the nEE group**

- Cervical cancer screening
- HPV vaccination

### **The affect of influences imposed by family and friends on cervical prevention behaviours**

- Mother/daughter/sister
- Other family
- Friends

### **Discussing cervical cancer prevention**

- Discussing the smear test
- Discussing HPV testing and treatment
- Forums in which discussion about cervical cancer may occur

**The views and perceptions of the participants on how the uptake of cervical cancer prevention methods might be increased**

- Media, leaflets and social media outlets
- The importance of the content of promoting screening uptake
- Increasing uptake for EE born women
- Education
